# Supplementary material
Source: PubMed Central journal article supplement (PMC2277204)
Supplement: tjp0583-0875-SD8.pdf [file tjp0583-0875-SD8.pdf]

**Figure S1. Voltage-dependence of enzymatic activity of VSD mutants as reported by Kir currents**

**A**, representative traces of Kir current from oocytes expressing GIRK2 (Kir3.2) channel and G-protein  $\beta$  and  $\gamma$  subunits with Ci-VSP D151N (red) or D164N/D186N (blue), respectively. Inset shows a pulse protocol. GIRK2 current was recorded by a short hyperpolarizing step to -100 mV with intervals to varied voltages from -90 mV (D164N/D186N) or -80 mV (wild-type and D151N) by 10 mV increment. For clarity, only traces with four voltages during intervals are shown for D151N and D164N/D186N, respectively. Interval duration was 60 seconds.

**B**, the maximum gating charges (Q-off) integrated from OFF-gating currents. These were obtained from oocytes that were microinjected with distinct doses of cRNAs. Data were obtained from the oocytes of the same batch of preparation.

**C**, comparison of voltage-dependency of Kir-reporting phosphatase activity among wild-type (Ci-VSP), D151N and D164N/D186N with different doses of injection. Data sets were obtained from the sister oocytes of the same microinjection as the cells used for recording of data shown in **B**. Current amplitudes of GIRK2 currents were normalized as previously reported and plotted against the interval voltages. The curve was fitted with the Boltzmann equation: Enzyme Activity =  $a+b/[1+\exp\{(V-V_{1/2})/k\}]$ .  $V_{1/2}$  (mV) = -29.3 (Ci-VSP), -3.79 (D151N 1x), -23.5 (D151N 3x), -28.4 (D151N 10x), -43.6 (D164N/D186N 1/3), -47.9 (D164N/D186N 1/10).  $k$  = 9.77 (wild -type), 8.62 (D151N 1x), 7.69 (D151N 3x), 8.46 (D151N 10x), 10.7 (D164N/D186N 1/3), 8.62 (D164N/D186N 1/10).

**D**,  $V_{1/2}$ s and maximum gating charges were X-Y plotted for each batch of oocytes that were injected with distinct doses of cRNAs for each Ci-VSP construct. Note that  $V_{1/2}$ s

of D151N are slightly shifted in a negative direction as the magnitude of gating charges increases.  $V_{1/2}$  of D151N is significantly less negative than D164/D186N within a fixed range of gating charges (indicated as box).

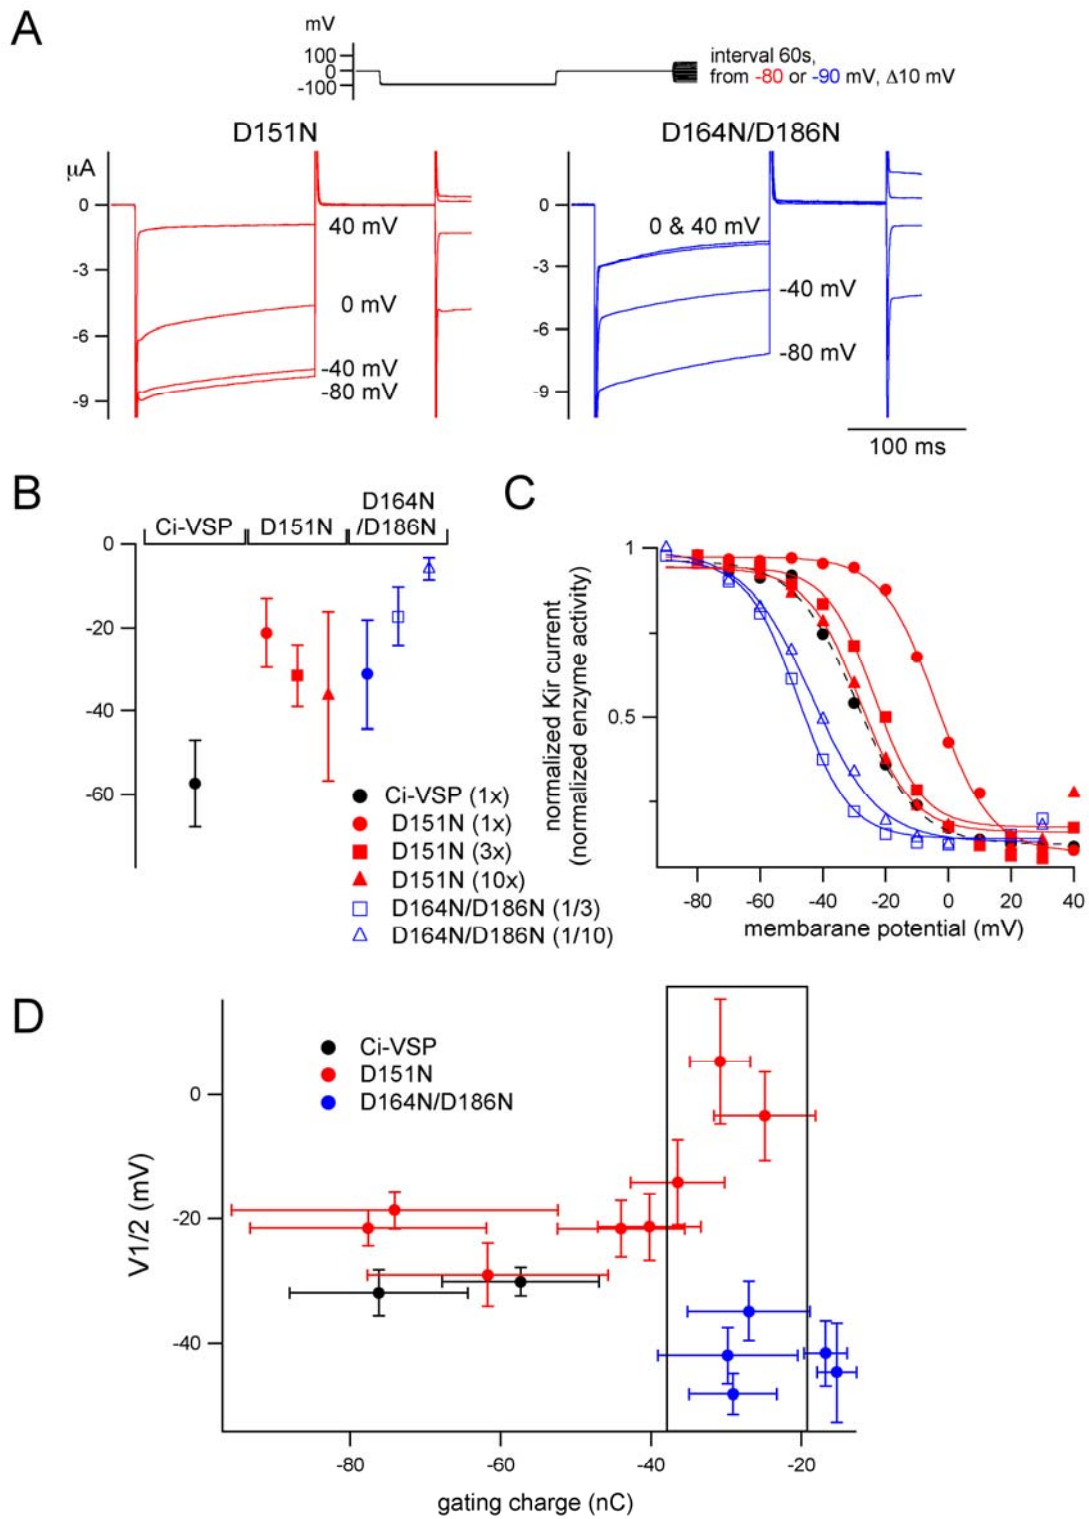

Fig.S1 Murata and Okamura

Fig. 2S Murata and Okamura

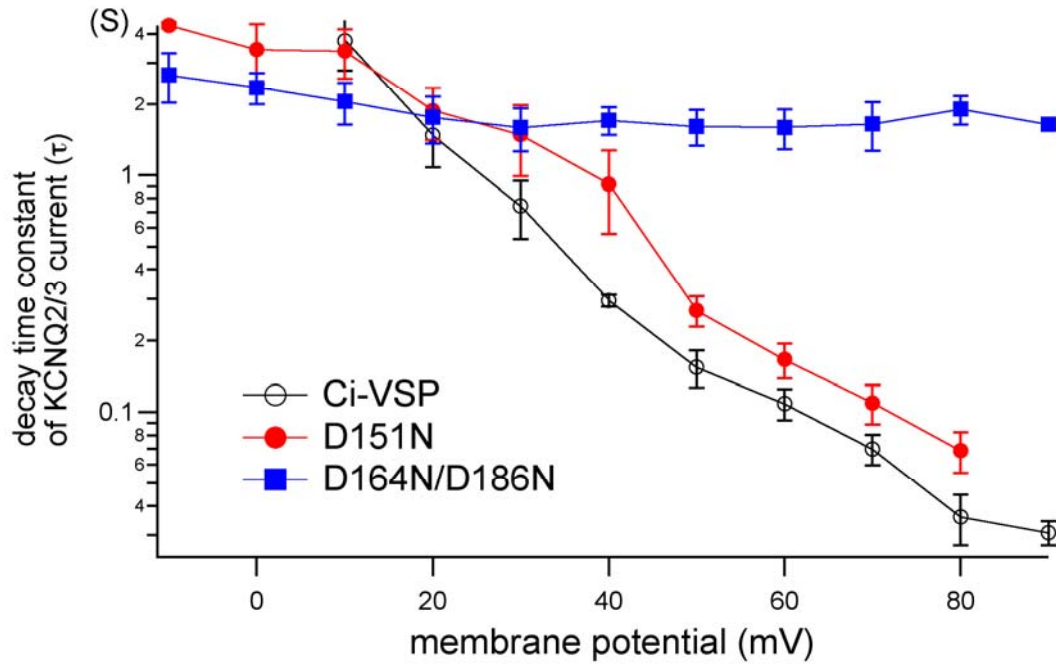

**Figure S2. Decay time constants of KCNQ2/3 current coexpressed with wild-type and the VSD mutants**

Rate constant for fitting decay of KCNQ2/3 currents in single exponentials was plotted in a semilogarithmic scale. The numbers of cells were 3, 3, 4 for Ci-VSP, D151N, and D164N/D186N, respectively.
